# Supplementary material for: Comparison of the Antioxidant Potency of Four Triterpenes of Centella asiatica against Oxidative Stress
Source: MDPI journal article supplement (doi:10.3390/antiox13040483), 2024-04-18
Supplement: s1 [file s1]

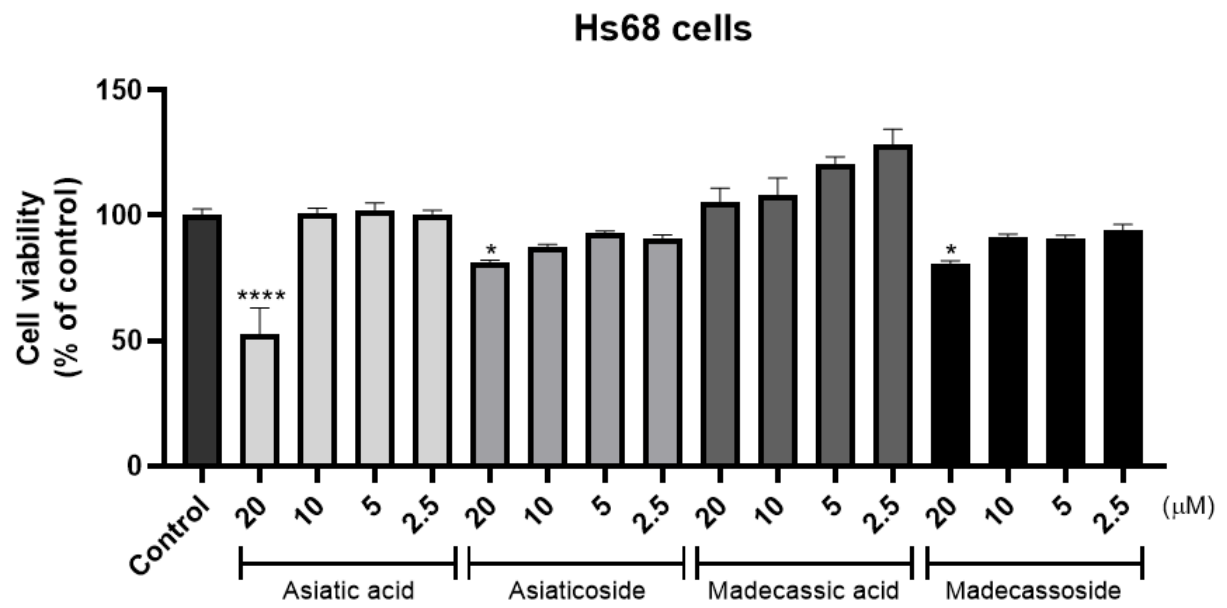

Figure S1. Sample cytotoxicity in Hs68 cells.

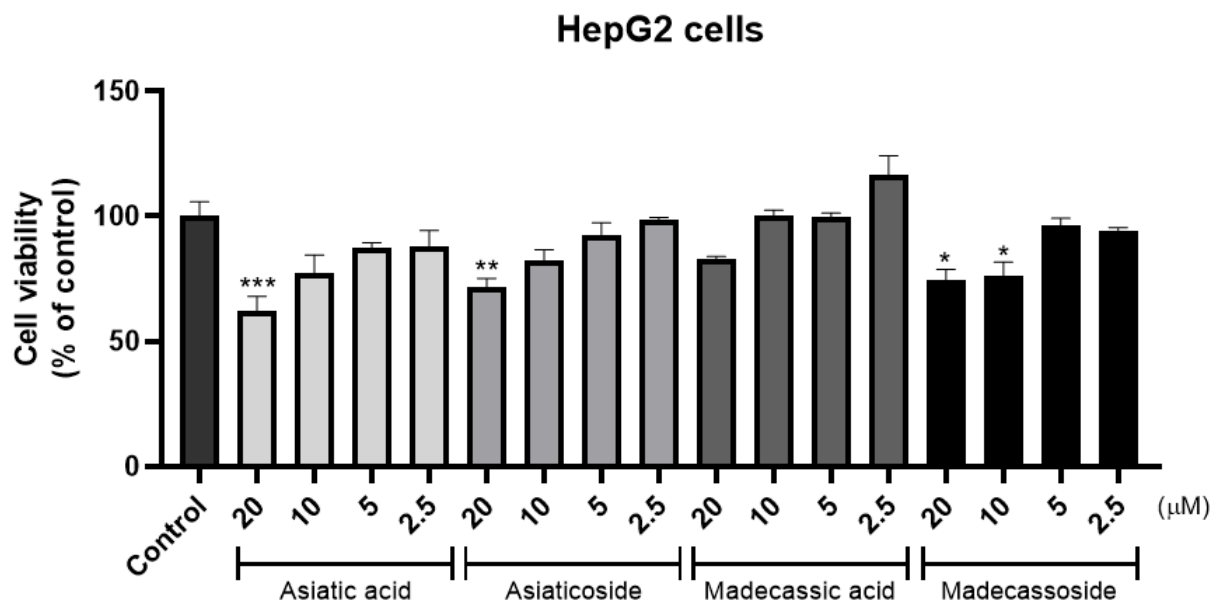

Figure S2. Sample cytotoxicity in HepG2 cells.



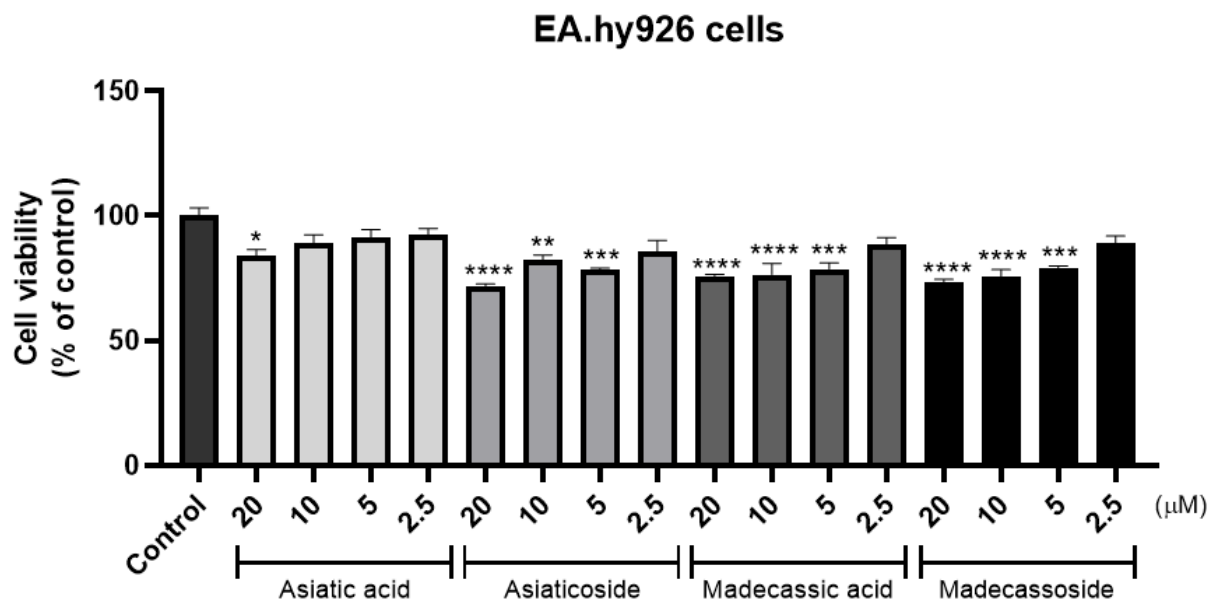

Figure S3. Sample cytotoxicity in EA.hy926 cells.

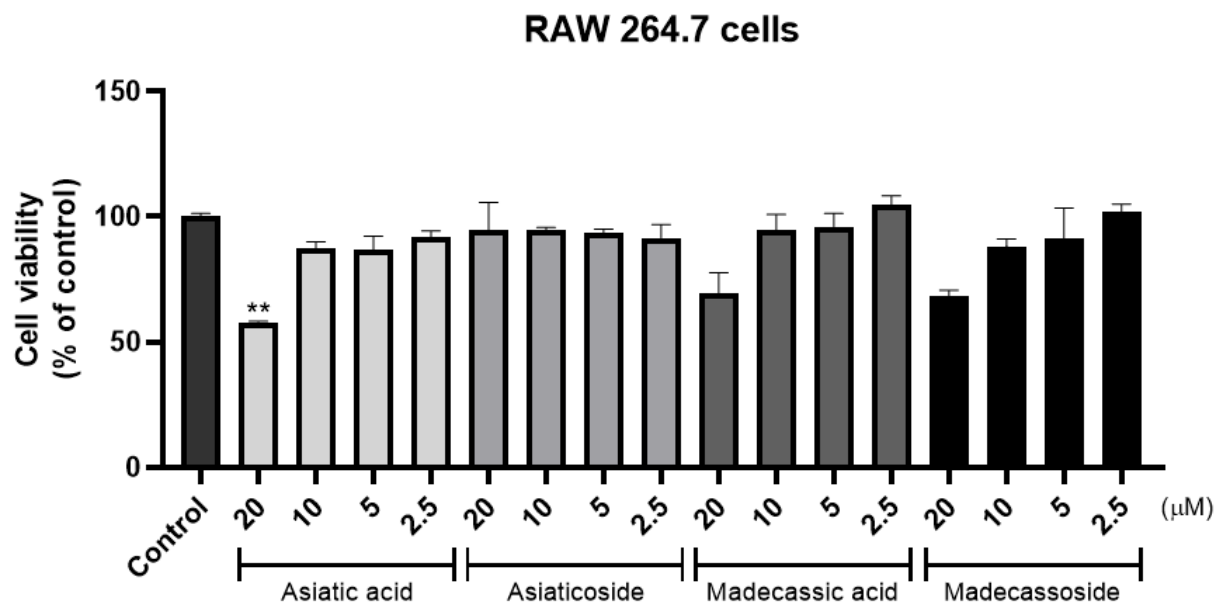

Figure S4. Sample cytotoxicity in RAW264.7 cells.
